# Supplementary material for: Characterization of Wear Properties of Pure Nickel Modified by Ni-Cr Composite and CaF2 Solid Lubricant Addition
Source: MDPI journal article supplement (doi:10.3390/ma15217511), 2022-10-26
Supplement: s1 [file s1]

## Supplementary material for

# Characterization of Wear Properties of Pure Nickel Modified by Ni-Cr Composite and $\text{CaF}_2$ Solid Lubricant Addition

Mateusz Kotkowiak \* and Adam Piasecki \*

Institute of Materials Engineering, Faculty of Materials Engineering and Technical Physics,  
Poznan University of Technology, Jana Pawła II 24, 60-965 Poznan, Poland

\* Correspondence: mateusz.kotkowiak@put.poznan.pl (M.K.); adam.piasecki@put.poznan.pl (A.P.)

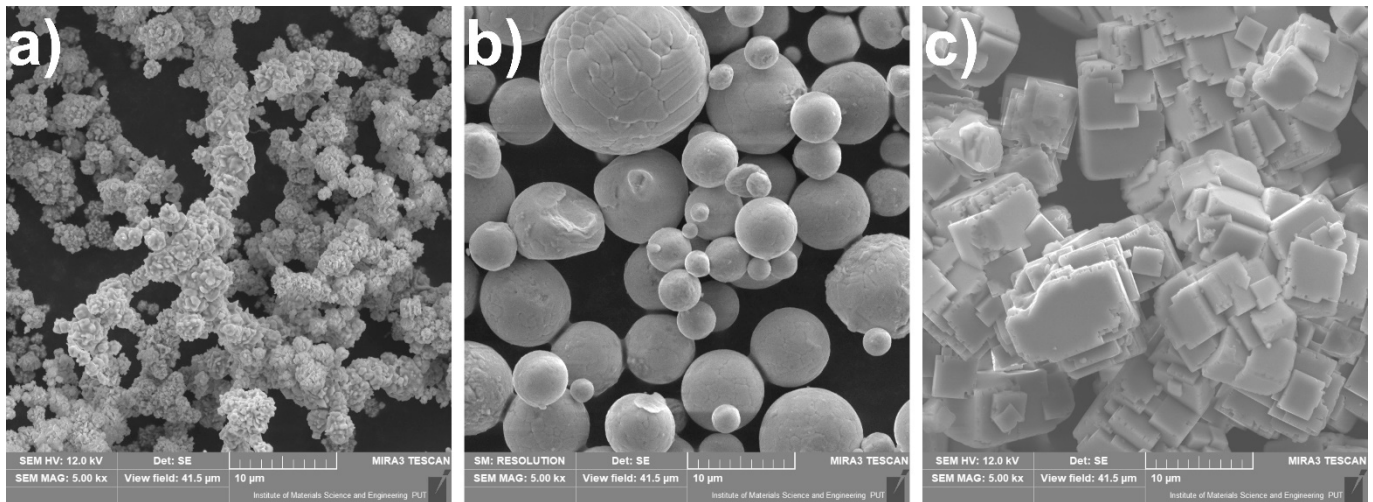

**Figure S1.** The powders used in this investigation: pure Ni (a), Ni-Cr (80/20) (b) and  $\text{CaF}_2$  (c).

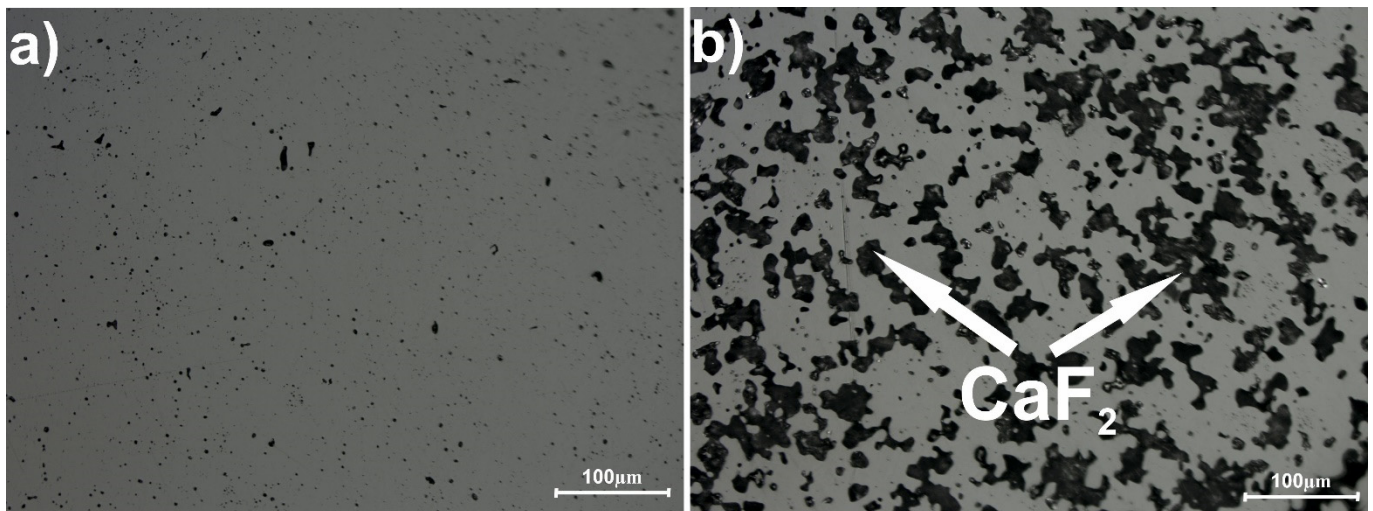

**Figure S2.** Microstructure of produced sinters: Ni + Ni-Cr (a) and Ni + Ni-Cr + 20% $\text{CaF}_2$  (b).
